# Supplementary material for: FeCo alloy nanoparticles encapsulated in hollow N-doped carbon as a bifunctional electrocatalyst for aqueous zinc–air batteries with a low voltage gap
Source: Royal Society of Chemistry journal article supplement (doi:10.1039/d3se01067h), 2023-01-01
Supplement: d3se01067h1.pdf [file d3se01067h1.pdf]

## Supporting Information

### **FeCo alloy nanoparticle encapsulated in hollow N-doped carbon as bifunctional electrocatalyst for aqueous zinc-air batteries with low voltage gap**

*Nan Li ‡, Ting Yang ‡, Hang Lou, Lijuan Huang, Xiaoyu Ma, Hao Jiang, Jiaxiang Xiao, Chao Xie\*, Yahui Yang\**

College of Chemistry and Chemical Engineering, Hunan Normal University, Changsha 410081, China

‡These authors contributed equally to this work and should be considered as co-first authors.

\*Corresponding author

E-mail address: xc9229@outlook.com (C. Xie); yangyahui2002@sina.com (Y. Yang)

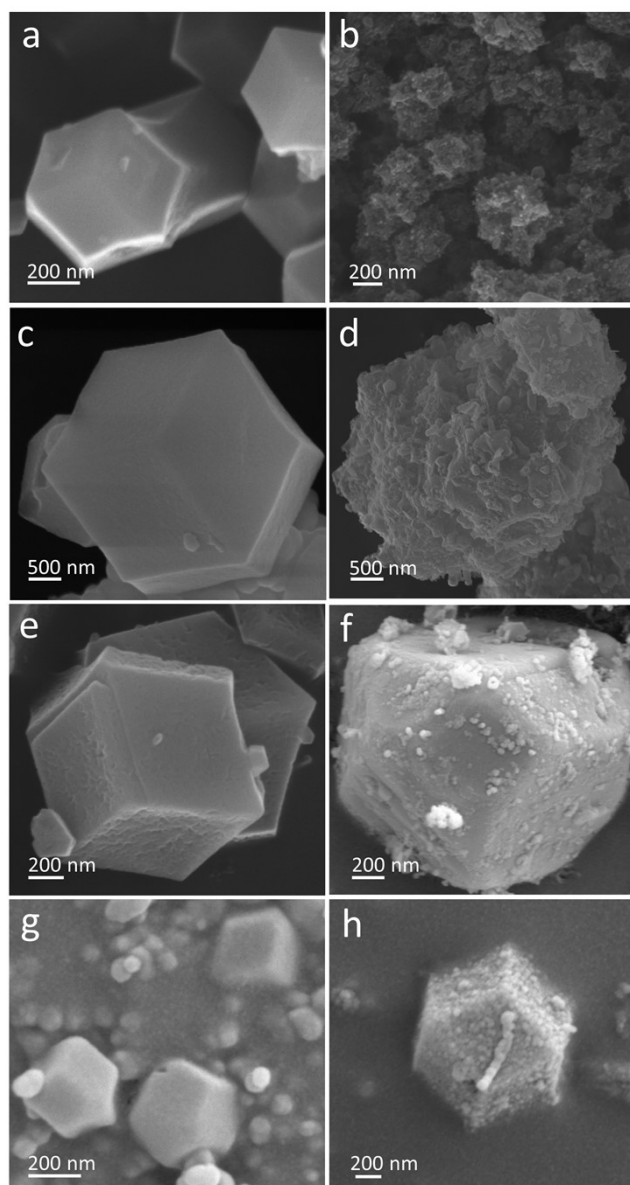

**Figure S1.** SEM images of (a) ZnFe-ZIF-0.1, (b)  $\text{Fe}_x\text{Co}_y\text{@N-C-0.1}$ , (c) ZnFe-ZIF-0.5, (d)  $\text{Fe}_x\text{Co}_y\text{@N-C-0.5}$ , (e) ZnFe-ZIF-0.3, (f) Fe@N-C, (g) ZnCo-ZIF, and (h) Co@N-C.

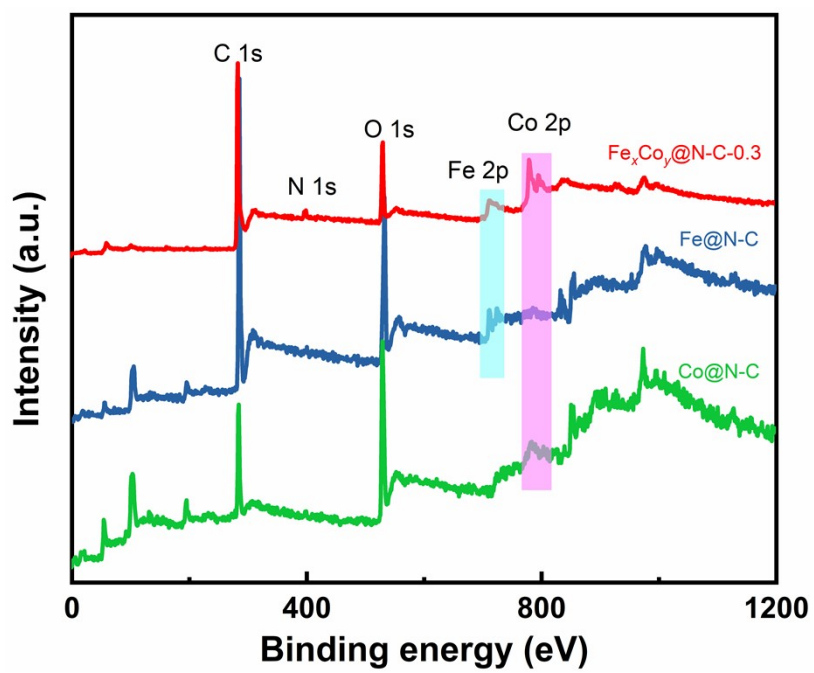

Figure S2. XPS spectrums of  $\text{Fe}_x\text{Co}_y@N-C-0.3$ ,  $\text{Fe}@N-C$  and  $\text{Co}@N-C$ .

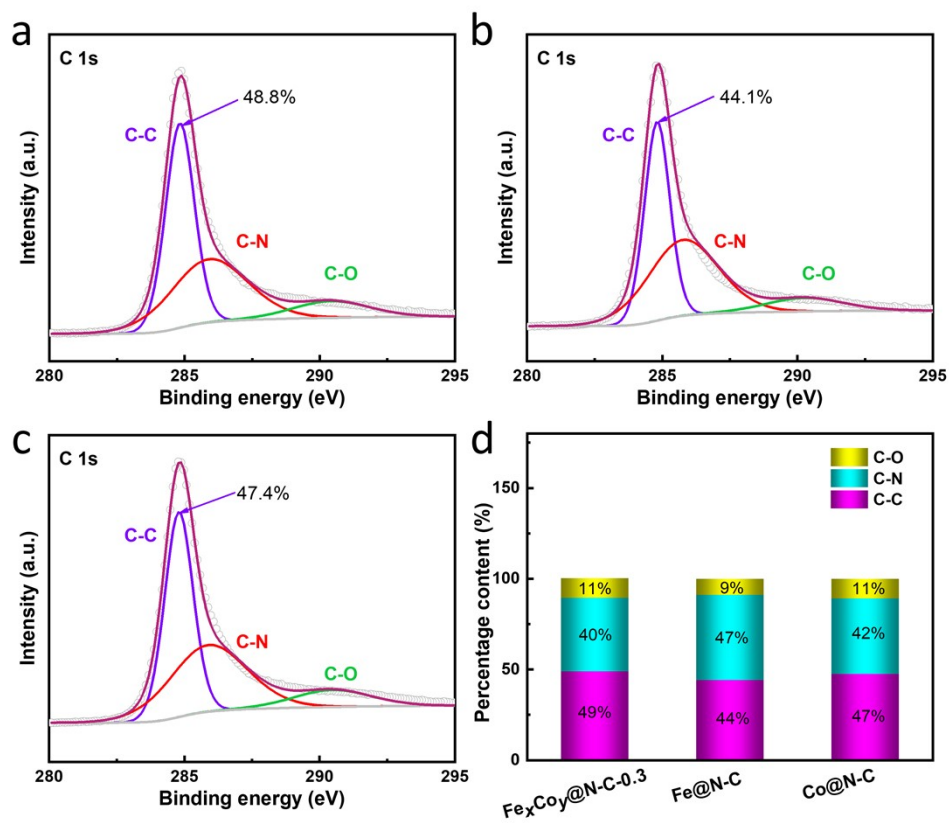

**Figure S3.** The C 1s XPS spectrums of (a)  $\text{Fe}_x\text{Co}_y@N-C-0.3$ , (b)  $\text{Fe}@N-C$ , and (c)  $\text{Co}@N-C$ . (d) Comparison of various C contents in  $\text{Fe}_x\text{Co}_y@N-C-0.3$ ,  $\text{Fe}@N-C$ , and  $\text{Co}@N-C$ .

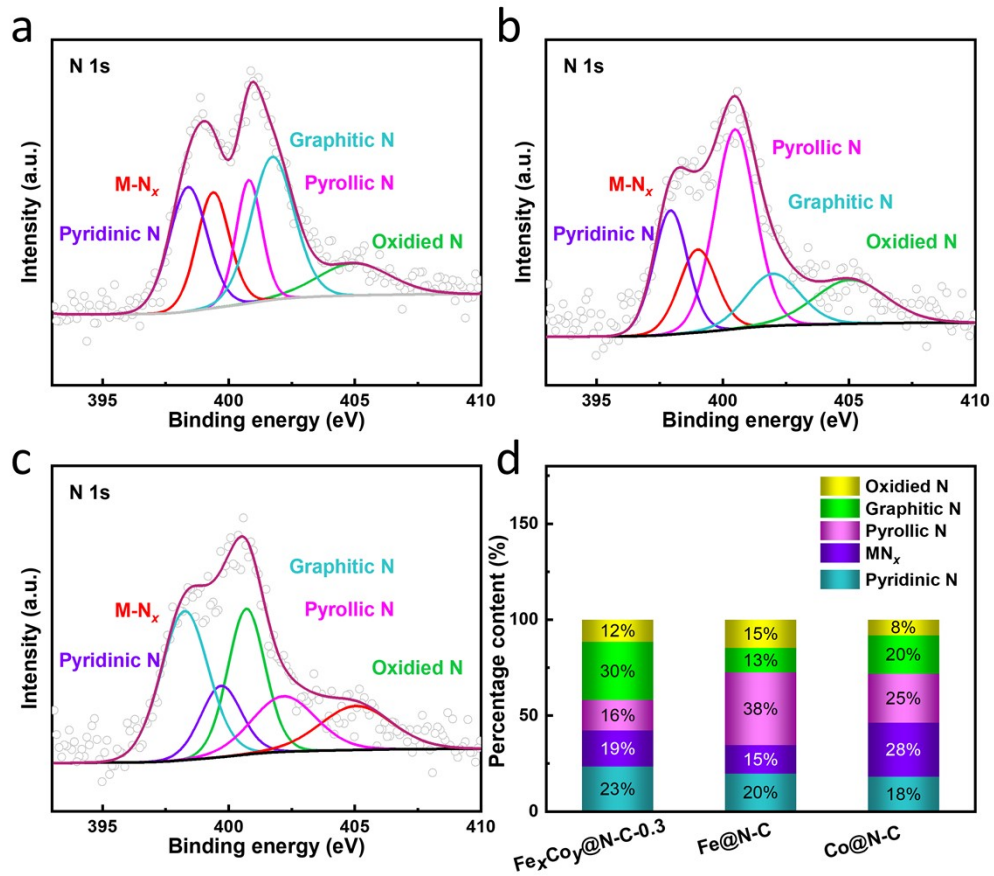

**Figure S4.** The N 1s XPS spectra of (a) Fe<sub>x</sub>Co<sub>y</sub>@N-C-0.3, (b) Fe@N-C, and (c) Co@N-C. (d) Comparison of various N contents in Fe<sub>x</sub>Co<sub>y</sub>@N-C-0.3, Fe@N-C, and Co@N-C.

**Table S1.** Comparison of the ORR performance of as-prepared catalysts.

| Catalyst                                    | $E_{1/2}$ (V vs. RHE) | The Tafel slope (mV dec <sup>-1</sup> ) |
|---------------------------------------------|-----------------------|-----------------------------------------|
| Fe <sub>x</sub> Co <sub>y</sub> @N-C-0.1    | 0.839                 | 90.9                                    |
| <b>Fe<sub>x</sub>Co<sub>y</sub>@N-C-0.3</b> | <b>0.842</b>          | <b>88.1</b>                             |
| Fe <sub>x</sub> Co <sub>y</sub> @N-C-0.5    | 0.836                 | 94.3                                    |
| Fe@N-C                                      | 0.810                 | 101.5                                   |
| Co@N-C                                      | 0.803                 | 118.2                                   |
| Pt/C                                        | 0.809                 | 100.7                                   |

**Table S2.** Comparison of ORR performance (vs. RHE) of Fe<sub>x</sub>Co<sub>y</sub>@N-C-0.3 with reported M-N-C catalysts in alkaline solution.

| Catalysts                                   | $E_{1/2}$ (V) | $E_{onset}$ (V) | Ref.                                                       |
|---------------------------------------------|---------------|-----------------|------------------------------------------------------------|
| <b>Fe<sub>x</sub>Co<sub>y</sub>@N-C-0.3</b> | <b>0.842</b>  | <b>0.98</b>     | <b>This work</b>                                           |
| Fe <sub>8</sub> Co <sub>0.2</sub> -NC-800   | 0.820         | /               | <i>Nano-Micro Lett.</i> <b>2023</b> , 15, 26.              |
| NP-Co <sub>SA</sub> NC                      | 0.860         | /               | <i>Energy Storage Materials</i> <b>2023</b> , 56, 165–173. |
| CoFe@NC/KB-800                              | 0.845         | 0.95            | <i>Chem. Eng. J.</i> <b>2022</b> , 427, 131614.            |
| CoNi-CoN <sub>4</sub> -HPC-900              | 0.820         | 1.03            | <i>Nano Energy</i> <b>2022</b> , 99, 107325.               |
| ZnCo-HNC                                    | 0.820         | 1.05            | <i>Small</i> <b>2022</b> , 18, e2107141.                   |
| Co@NPC/C-MWCNTs                             | 0.790         | 0.87            | <i>Chem. Eng. J.</i> <b>2022</b> , 432, 134192.            |
| CoNP@FeNC-0.05                              | 0.850         | 1.02            | <i>Nano-Micro Lett.</i> <b>2022</b> , 14, 162.             |
| CoFe/S-N-C                                  | 0.855         | /               | <i>Chem. Eng. J.</i> <b>2022</b> , 429, 132174.            |
| Co/CoFe@NC                                  | 0.840         | 0.97            | <i>Nano-Micro Lett.</i> <b>2021</b> , 13, 126.             |
| FeCo/N-HCSs                                 | 0.791         | 0.98            | <i>Chem. Eng. J.</i> <b>2021</b> , 407, 127961.            |
| Fe <sub>1</sub> -HNC-500-850                | 0.842         | 0.93            | <i>Adv. Mater.</i> <b>2020</b> , 32, 1906905.              |
| Fe <sub>3</sub> C-Co/NC                     | 0.830         | 0.94            | <i>Adv. Funct. Mater.</i> <b>2019</b> , 29, 1901949        |

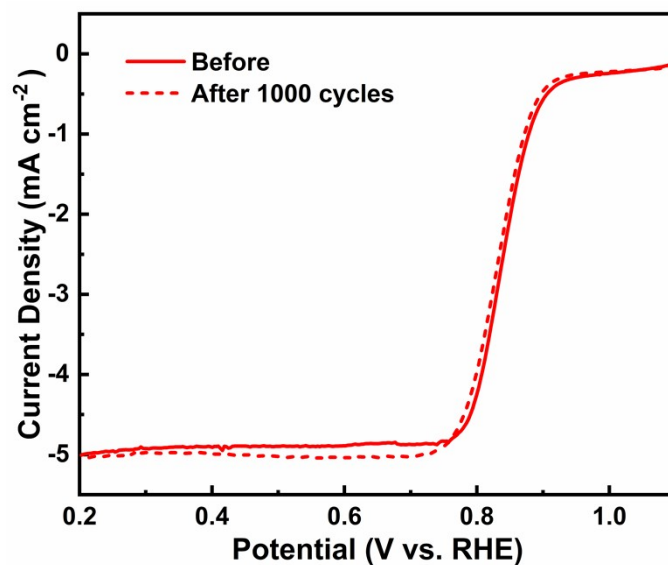

**Figure S5.** LSV curves of ORR obtained before and after CV tests of 2000 cycles for Fe<sub>x</sub>Co<sub>y</sub>@N-C-0.3.

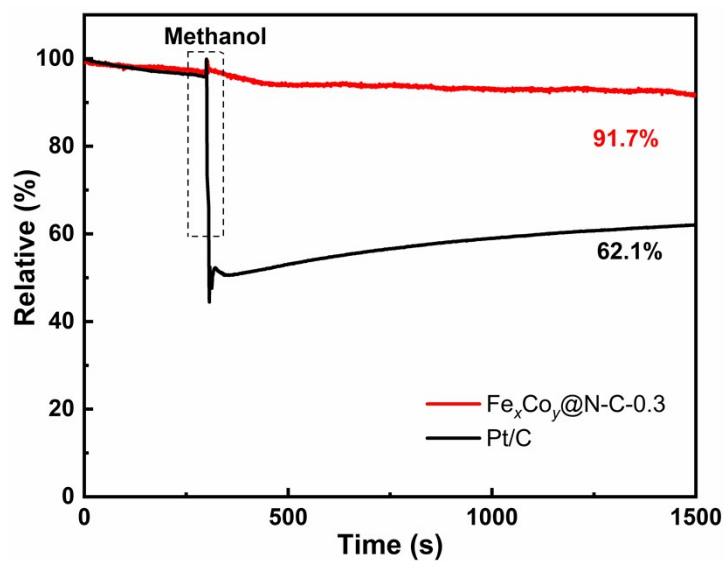

**Figure S6.** Methanol crossover tolerance test of Fe<sub>x</sub>Co<sub>y</sub>@N-C-0.3 and Pt/C.



**Table S3.** Comparison of the OER performance of as-prepared catalysts.

| <b>Catalyst</b>                             | <b><math>E_{j=10}</math> (V vs. RHE)</b> | <b>The Tafel slope (mV dec<sup>-1</sup>)</b> |
|---------------------------------------------|------------------------------------------|----------------------------------------------|
| Fe <sub>x</sub> Co <sub>y</sub> @N-C-0.1    | 1.597                                    | 119.1                                        |
| <b>Fe<sub>x</sub>Co<sub>y</sub>@N-C-0.3</b> | <b>1.528</b>                             | <b>87.7</b>                                  |
| Fe <sub>x</sub> Co <sub>y</sub> @N-C-0.5    | 1.645                                    | 150.0                                        |
| Fe@N-C                                      | 1.661                                    | 169.3                                        |
| Co@N-C                                      | 1.637 (fast decay)                       | 147.6                                        |
| RuO <sub>2</sub>                            | 1.607                                    | 138.8                                        |

**Table S4.** Comparison of OER performance (vs. RHE) of Fe<sub>x</sub>Co<sub>y</sub>@N-C-0.3 with recently reported M-N-C catalysts in alkaline solution.

| Catalyst                                    | $E_{j=10}$ (V) | Tafel slope (mV dec <sup>-1</sup> ) | Ref.                                                       |
|---------------------------------------------|----------------|-------------------------------------|------------------------------------------------------------|
| <b>Fe<sub>x</sub>Co<sub>y</sub>@N-C-0.3</b> | <b>1.528</b>   | <b>87.7</b>                         | <b>This work</b>                                           |
| Fe <sub>8</sub> Co <sub>0.2</sub> -NC-800   | 1.630          | 89.1                                | <i>Nano-Micro Lett.</i> <b>2023</b> , 15, 26.              |
| Co@C-CoNC                                   | 1.638          | 73.0                                | <i>Nano-Micro Lett.</i> <b>2023</b> , 15, 48.              |
| NP-Co <sub>S<sub>A</sub></sub> NC           | 1.550          | /                                   | <i>Energy Storage Materials</i> <b>2023</b> , 56, 165–173. |
| CoNi-CoN <sub>4</sub> -HPC-900              | 1.700          | 153.0                               | <i>Nano Energy</i> <b>2022</b> , 99, 107325.               |
| CoNP@FeNC-0.05                              | 1.630          | 146.0                               | <i>Nano-Micro Lett.</i> <b>2022</b> , 14, 162              |
| Co@N-HPC-700                                | 1.710          | 168.5                               | <i>Chem. Eng. J.</i> <b>2022</b> , 433, 134469.            |
| Fe <sub>3</sub> C-Co/NC                     | 1.570          | 49.0                                | <i>Adv. Funct. Mater.</i> <b>2019</b> , 29, 1901949.       |

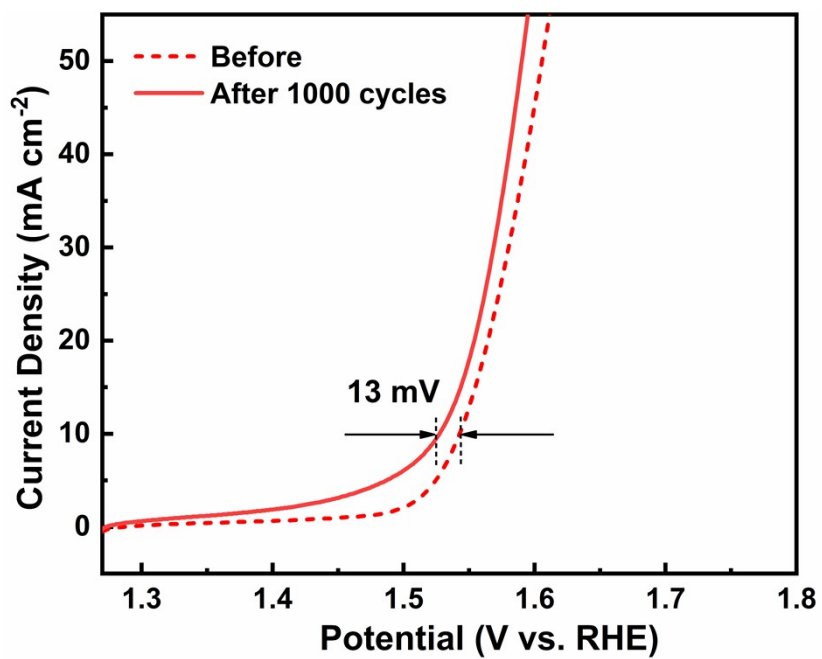

**Figure S7.** LSV curves of OER obtained before and after CV tests of 2000 cycles for Fe<sub>x</sub>Co<sub>y</sub>@N-C-0.3.

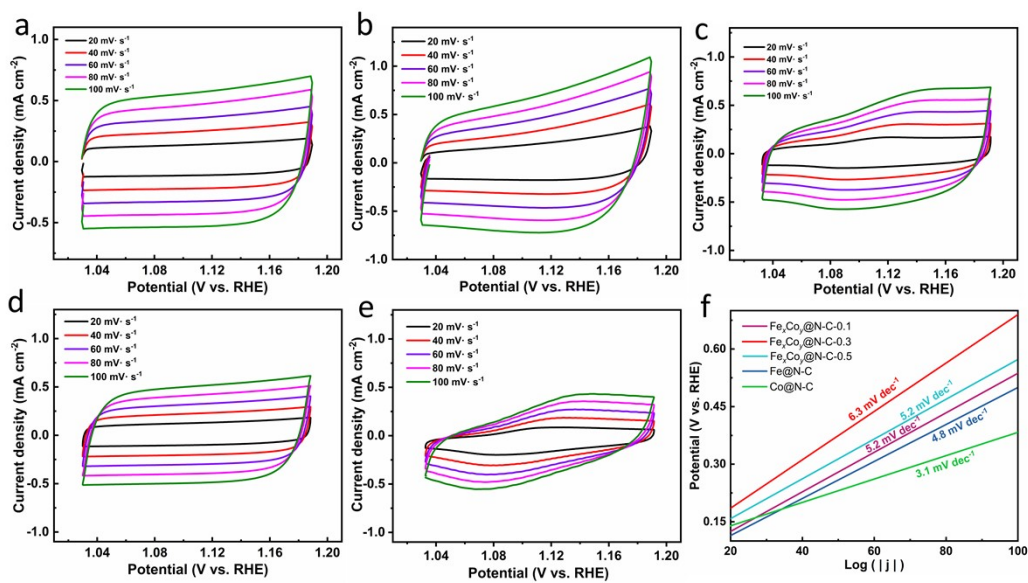

**Figure S8.** The CV tests at different scan rates of (a)  $\text{Fe}_x\text{Co}_y\text{@N-C-0.1}$ , (b)  $\text{Fe}_x\text{Co}_y\text{@N-C-0.3}$ , (c)  $\text{Fe}_x\text{Co}_y\text{@N-C-0.5}$ , (d)  $\text{Fe@N-C}$ , (e)  $\text{Co@N-C-0.5}$ , and (f) the corresponding  $C_{dl}$  value.

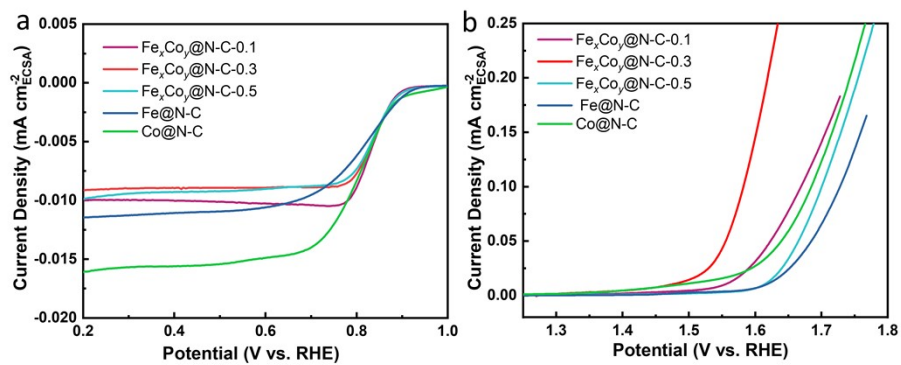

**Figure S9.** The specific activity based on ECSA for (a) OER and (b) HER.

**Table S5.** Comparison of the reversible potential difference ( $\Delta E$ ) (vs. RHE) of  $\text{Fe}_x\text{Co}_y\text{@N-C-0.3}$  with recently reported M-N-C catalysts in alkaline solution.

| Catalyst                                   | <i>ORR</i>    | <i>OER</i>     | $\Delta E$   | Ref.                                                           |
|--------------------------------------------|---------------|----------------|--------------|----------------------------------------------------------------|
|                                            | $E_{1/2}$ (V) | $E_{j=10}$ (V) | (V)          |                                                                |
| $\text{Fe}_x\text{Co}_y\text{@N-C-0.3}$    | <b>0.842</b>  | <b>1.528</b>   | <b>0.686</b> | <b>This work</b>                                               |
| $\text{Fe}_8\text{Co}_{0.2}\text{-NC-800}$ | 0.820         | 1.630          | 0.810        | <i>Nano-Micro Lett.</i> <b>2023</b> ,<br>15, 26.               |
| NP- $\text{Co}_s\text{ANC}$                | 0.860         | 1.550          | 0.790        | <i>Energy Storage Materials</i> <b>2023</b> , 56, 165–<br>173. |
| $\text{CoFe@NC/KB-800}$                    | 0.845         | 1.615          | 0.770        | <i>Chem. Eng. J.</i> <b>2022</b> , 427,<br>131614.             |
| $\text{CoNi-CoN}_4\text{-HPC-900}$         | 0.820         | 1.700          | 0.880        | <i>Nano Energy</i> <b>2022</b> , 99,<br>107325.                |
| $\text{CoNP@FeNC-0.05}$                    | 0.850         | 1.630          | 0.780        | <i>Nano-Micro Lett.</i> <b>2022</b> ,<br>14, 162.              |
| $\text{Co/CoFe@NC}$                        | 0.840         | 1.540          | 0.700        | <i>Nano-Micro Lett.</i> <b>2021</b> ,<br>13, 126.              |
| $\text{FeCo/N-HCSs}$                       | 0.791         | 1.522          | 0.731        | <i>Chem. Eng. J.</i> <b>2021</b> , 407,<br>127961.             |
| $\text{Fe}_3\text{C-Co/NC}$                | 0.830         | 1.570          | 0.740        | <i>Adv. Funct. Mater.</i> <b>2019</b> ,<br>29, 1901949         |

**Table S6.** Performances of recently reported aqueous ZABs based on M-N-C catalysts.

| Catalyst                                     | OCP(V)      | Peak power density (mW cm <sup>-2</sup> ) | The voltage gap (V) | Stability                            | Ref.                                                      |
|----------------------------------------------|-------------|-------------------------------------------|---------------------|--------------------------------------|-----------------------------------------------------------|
| <b>Fe<sub>x</sub>Co<sub>y</sub>@N-C-0.3</b>  | <b>1.45</b> | <b>191.00</b>                             | <b>0.73</b>         | <b>345 h at 5 mA cm<sup>-2</sup></b> | <b>This work</b>                                          |
| Fe <sub>8</sub> Co <sub>0.2</sub> -NC-800    | ~1.43       | 124.90                                    | /                   | 311 h at 5 mA cm <sup>-2</sup>       | <i>Nano-Micro Lett.</i> <b>2023</b> , 15, 26.             |
| Co@C-CoNC                                    | 1.53        | 162.8                                     | ~0.85               | 100 h at 2 mA cm <sup>-2</sup>       | <i>Nano-Micro Lett.</i> <b>2023</b> , 15, 48.             |
| NP-Co <sub>S</sub> A <sub>N</sub> C          | 1.42        | 158.10                                    | 0.88                | 80 h at 10 mA cm <sup>-2</sup>       | <i>Energy Storage Materials</i> <b>2023</b> , 56, 165–173 |
| FeCo-DACs/NC                                 | 1.50        | 175.00                                    | ~0.91               | 240 h at 10 mA cm <sup>-2</sup>      | <i>Adv. Mater.</i> <b>2022</b> , 34, 2107421.             |
| Co/ZnCo <sub>2</sub> O <sub>4</sub> @NC-CNTs | 1.47        | 305.00                                    | 0.92                | 103 h at 20 mA cm <sup>-2</sup>      | <i>Nano Energy</i> <b>2021</b> , 82, 105710.              |
| Co/CoFe@NC                                   | 1.49        | 146.60                                    | 0.74                | ~360 h at 20 mA cm <sup>-2</sup>     | <i>Nano-Micro Lett.</i> <b>2021</b> , 13, 126.            |
| CoNC-NB2                                     | 1.50        | 246.00                                    | ~1.00               | 140 h at 2 mA cm <sup>-2</sup>       | <i>Small</i> <b>2020</b> , 16, 2001171.                   |
| H-Co@FeCo/N/C                                | 1.45        | 125.20                                    | 1.00                | 200 h at 2 mA cm <sup>-2</sup>       | <i>Appl. Catal. B Environ.</i> <b>2020</b> , 278, 119259. |
| CoNi-SAs/NC                                  | 1.45        | 101.40                                    | 0.82                | ~32 h at 5 mA cm <sup>-2</sup>       | <i>Adv. Mater.</i> <b>2019</b> , 31, 1905622.             |
| Fe/Co-N/S-Cs                                 | ~1.40       | 102.63                                    | 0.69                | ~30 h at 5 mA cm <sup>-2</sup>       | <i>Appl. Catal. B Environ.</i> <b>2019</b> , 241, 95-103. |

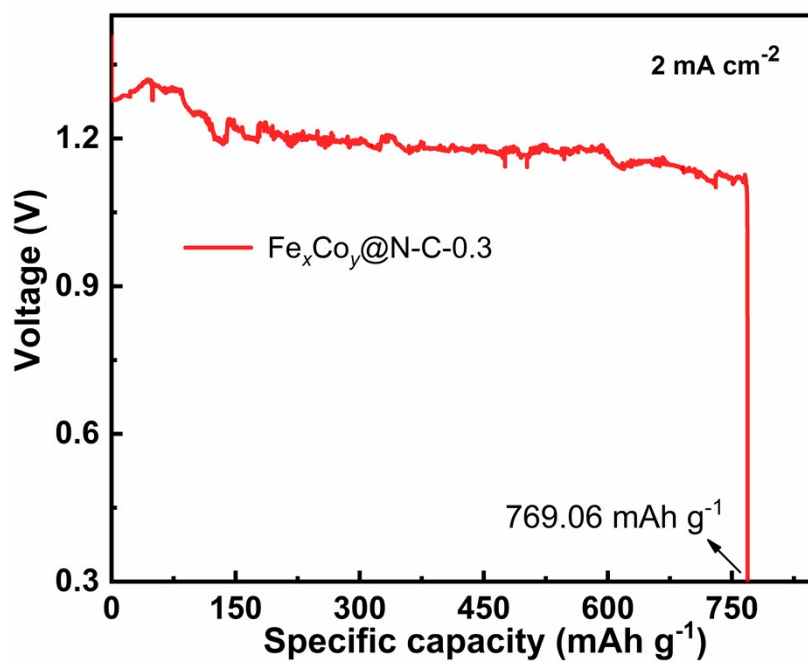

**Figure S10.** The specific capacity curve of the flexible ZABs based on  $\text{Fe}_x\text{Co}_y@N\text{-C-0.3}$ .



**Table S7.** Performances of recently reported flexible ZABs based on M-N-C catalysts.

| Catalyst                                     | OCP (V) | Stability                      | Ref.                                                                   |
|----------------------------------------------|---------|--------------------------------|------------------------------------------------------------------------|
| $\text{Fe}_x\text{Co}_y\text{@N-C-0.3}$      | 1.40    | 50 h at 5 mA cm <sup>-2</sup>  | This work                                                              |
| $\text{Fe}_8\text{Co}_{0.2}\text{-NC-800}$   | ~1.39   | /                              | <i>Nano-Micro Lett.</i> <b>2023</b> , 15, 26.<br><i>Energy Storage</i> |
| NP-Co <sub>S</sub> A <sub>N</sub> C          | 1.32    | 5 h at 2 mA cm <sup>-2</sup>   | <i>Materials</i> <b>2023</b> , 56, 165–173.                            |
| CoNi-CoN <sub>4</sub> -HPC-900               | 1.50    | ~27 h at 5 mA cm <sup>-2</sup> | <i>Nano Energy</i> , <b>2022</b> , 99, 107325.                         |
| CoFe/N-HCSs                                  | 1.40    | 10 h at 1 mA cm <sup>-2</sup>  | <i>Chem. Eng. J.</i> <b>2021</b> , 407, 127961.                        |
| CoFe@NO-CNT                                  | 1.45    | 56 h at 2 mA cm <sup>-2</sup>  | <i>Electrochimica Acta</i> <b>2021</b> , 388, 138587.                  |
| Co/CoFe@NC                                   | 1.48    | ~92 h at 5 mA cm <sup>-2</sup> | <i>Nano-Micro Lett.</i> 2021, 13, 126.                                 |
| Co/ZnCo <sub>2</sub> O <sub>4</sub> @NC-CNTs | 1.30    | ~20 h at 5 mA cm <sup>-2</sup> | <i>Nano Energy</i> <b>2021</b> , 82, 105710.                           |
| CoFe/N-HCSs                                  | 1.40    | 10 h at 1 mA cm <sup>-2</sup>  | <i>Chem. Eng. J.</i> <b>2021</b> , 407, 127961                         |
| Co-NCNT                                      | 1.42    | 30 h at 2 mA cm <sup>-2</sup>  | <i>Carbon Energy</i> <b>2020</b> , 2, 461-471.                         |
